# Supplementary material for: Identification and Validation of an RNA Binding Proteins-Associated Prognostic Signature for Non-Small Cell Lung Cancer
Source: Research Square preprint supplement (doi:10.21203/rs.3.rs-100245/v1), 2020-11-04
Supplement: Supplementary file 1 [file 1061ba69541e99ea731d2832.docx]

**Table 1**. clinical features of patients with NSCLC (n= 998) from TCGA

Clinical characteristic N %

Age (years)

>= 65 605 60.62

< 65 393 39.38

Gender

Male 599 60.02

Female 399 39.98

T classification

T1-T2 788 78.96

T3-T4 198 19.84

Tx 3 0.30

N classification

N0 638 63.93

N1–3 342 34.27

Nx 18 1.80

M classification

M0 739 74.04

M1 32 3.20

Mx 227 22.75

UICC stage

stage Ⅰ-Ⅱ 788 79.00

stage ⅠⅡ–IV 198 19.84

stage x 12 1.20
